# Supplementary material for: A prognostic model for predicting progression-free survival in patients with advanced non-small cell lung cancer after image-guided microwave ablation plus chemotherapy
Source: Springer Nature journal article supplement (doi:10.1007/s00330-023-09804-9), 2023-06-15
Supplement: MOESM1 [file 25489952]

**A prognostic model for predicting progression-free survival in patients with advanced non–small cell lung cancer after image-guided microwave ablation plus chemotherapy**

**ELECTRONIC SUPPLEMENTARY MATERIAL**

**eTable 1. Information of devices and medications administrated for therapy**

| Devices and Medications             | Company Information                                      |
|-------------------------------------|----------------------------------------------------------|
| Microwave Ablation Devices          |                                                          |
| MTC-3C microwave ablation system    | China Medical Devices R&D Center; Beijing, China         |
| ECO-100A1 microwave ablation system | ECO Medical Instrument Co., Ltd; Nanjing, Jiangsu, China |
| KY-2450B microwave ablation system  | CANYON Medical Inc.; Nanjing, Jiangsu, China             |
| CT Devices                          |                                                          |
| Lightspeed 64 V                     | General Electric Co.; Boston, Massachusetts, USA         |
| Medications                         |                                                          |
| Pemetrexed                          | Hansoh Pharma; Hong Kong SAR, China                      |
| Paclitaxel                          | Hengrui Medicine; Lianyungang, Jiangsu, China            |
| Docetaxel                           | Qilu Pharma; Jinan, Shandong, China                      |
| Gemcitabine                         | Hansoh Pharma; Hong Kong SAR, China                      |
| Vinorelbine                         | Hansoh Pharma; Hong Kong SAR, China                      |
| Cisplatin                           | Qilu Pharma; Jinan, Shandong, China                      |
| Nedaplatin                          | Qilu Pharma; Jinan, Shandong, China                      |
| Carboplatin                         | Qilu Pharma; Jinan, Shandong, China                      |
